RESEARCH ARTICLE

# Association of change in total cholesterol level with mortality: A population-based study

Su-Min Jeong<sup>1</sup>, Seulggie Choi<sup>2</sup>, Kyuwoong Kim<sup>2</sup>, Sung-Min Kim<sup>2</sup>, Gyeongsil Lee<sup>1a</sup>, Joung Sik Son<sup>1</sup>, Jae-Moon Yun<sup>1</sup>, Sang Min Park<sup>1,2,3\*</sup>

**1** Department of Family Medicine, Seoul National University Hospital, Seoul, Republic of Korea,

**2** Department of Biomedical Sciences, Seoul National University Graduate School, Seoul, Republic of Korea,

**3** Department of Family Medicine, Seoul National University College of Medicine, Seoul, Korea, Seoul, Republic of Korea

✉ Current address: Department of Family Medicine, Health Promotion Center, Chung-Ang University Hospital, Seoul, Republic of Korea

\* [smpark.snuh@gmail.com](mailto:smpark.snuh@gmail.com)

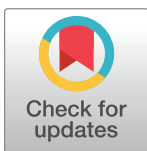

## Abstract

### Background

Hypercholesterolemia is a well-established risk factor for coronary heart disease, but the association between cholesterol level change and mortality is not fully understood. We aimed to investigate the association of 2 year (2002–2003 to 2004–2005) change in cholesterol with all-cause and cause-specific mortality in a population-based cohort study.

### Methods and findings

The study population consisted of 269,391 participants aged more than 40 years who were free of myocardial infarction, stroke and cancer using the Korean National Health Insurance Service—National Health Screening Cohort. Cholesterol levels were classified into 1st, 2nd and 3rd tertiles during each of the first and second health examinations, respectively. The participants were followed-up for all-cause and cause-specific mortality from 1 January 2006 to 31 December 2013. Compared to participants who stayed within the 2nd tertile group for cholesterol during both the first and second examinations, participants who became or maintained cholesterol levels to the 1st tertile during the second examination had increased risk of all-cause mortality [adjusted hazard ratio (aHR) with 95% confidence interval (95% CI) = 1.28 (1.18–1.38) in 1st/1st, 1.16 (1.07–1.26) in 2nd/1st and 1.47 (1.32–1.64) in 3rd/1st tertile levels, respectively]. In addition, increased or persistent high cholesterol levels to the 3rd tertile was associated with elevated risk for all-cause mortality [aHR (95% CI) = 1.10 (1.01–1.20) in 1st/2nd, 1.16(1.03–1.31) in 1st/3rd and 1.15(1.05–1.25) in 3rd/3rd tertile levels].

### Conclusions

Changes in cholesterol levels in either direction to low cholesterol or persistently low cholesterol levels were associated with higher risk of mortality. Particularly, spontaneous decline in cholesterol levels may be a marker for worsening health conditions.

## OPEN ACCESS

**Citation:** Jeong S-M, Choi S, Kim K, Kim S-M, Lee G, Son JS, et al. (2018) Association of change in total cholesterol level with mortality: A population-based study. PLoS ONE 13(4): e0196030. <https://doi.org/10.1371/journal.pone.0196030>

**Editor:** Katriina Aalto-Setälä, University of Tampere, FINLAND

**Received:** November 2, 2017

**Accepted:** April 5, 2018

**Published:** April 19, 2018

**Copyright:** © 2018 Jeong et al. This is an open access article distributed under the terms of the [Creative Commons Attribution License](https://creativecommons.org/licenses/by/4.0/), which permits unrestricted use, distribution, and reproduction in any medium, provided the original author and source are credited.

**Data Availability Statement:** Data are from the Korea National Health Insurance service (NHIS). Interested researchers can request access to the data from NHIS. The detailed information for data access of NHIS could be obtained from the NHIS website ([www.nhis.or.kr](http://www.nhis.or.kr)).

**Funding:** Seulggie Choi and Kyuwoong Kim received a scholarship from the BK21-plus education program provided by the National Research Foundation of Korea, outside of the submitted work.

**Competing interests:** The authors have declared that no competing interests exist.

## Introduction

Hypercholesterolemia is a well-established risk factor for coronary heart disease (CHD) [1, 2], indicating that cholesterol lowering therapy would be beneficial for prevention of CHD [3]. However, previous studies on the association between cholesterol levels and mortality have shown inconsistent results that vary according to age, cause of death, and sex [4–8]. Previous findings indicate that low cholesterol was associated with high mortality [6, 7]. For example, among the elderly, frailty or poor health status may have contributed to the increased risk of death among those with low cholesterol levels [9]. In addition, other previous studies have revealed a U-shaped relationship between cholesterol and mortality [10, 11]. Interestingly, the increased risk of death among those with low cholesterol was due to non-vascular disease, such as liver disease [12] or cancer [13], which is in contrast to the high contribution of cardiovascular disease (CVD) related mortality among those with high cholesterol levels [11].

A number of studies investigated the association between the change in cholesterol levels and mortality [5, 8]. A study from the Honolulu Heart Program revealed a 30% increase in mortality among people who had decreased levels of cholesterol [5]. The most common causes of deaths among those with declines in cholesterol levels were malignancies of the hematopoietic system, esophagus, and prostate and non-malignant liver disease. However, this study was limited to a relatively small number of male subjects ( $n = 5,941$ ). In a study using the Framingham data, those with decreasing cholesterol levels were associated with increased risk of all-cause and CVD mortality [8]. Spontaneous decline in cholesterol of 14 mg/dL during 14-years was associated with 11% increased risk of mortality, compared to those with stable or increased cholesterol levels. However, previous studies have been mainly performed in the Western population and the number of study population is relatively small.

In this study, we aimed to elucidate the association between change in cholesterol and all-cause mortality as well as cause-specific mortality using a nationally representative cohort.

## Methods

### Data source

National Health Insurance Service (NHIS) in the Republic of Korea covers approximately 97% of the Korean population and provides biennial health screening examinations called the National Health Screening Program (NHSP) to all enrollees above 40 years old [14]. The NHSP offers screening tests for several conditions, including anemia, liver disease and kidney disease as well as cardiovascular risk factors including blood pressure, lipid profile and fasting glucose. The National Health Insurance Service—National Health Screening Cohort (NHIS-HEALS) database is composed of demographic factors, results from the NHSP, utilization of medical facilities at outpatient and inpatient settings with the International Classification of Diseases, 10th revision (ICD-10) codes and the date and cause of death from the Korea National Statistical Office. In addition, NHIS-HEALS contains demographic information such as age, gender, health insurance premium, and disability. The NHIS database has been widely used in multiple epidemiological studies [15, 16] and its validity is described in detail elsewhere [17].

### Study population

The NHIS-HEALS database consists of about 510,000 randomly selected participants among the general population over 40 years ages who underwent health screening examinations in 2002 or 2003 and followed-up until 31 December 2013. We identified 334,058 participants who had cholesterol values in the first (2002–2003) and second (2004–2005) health examination

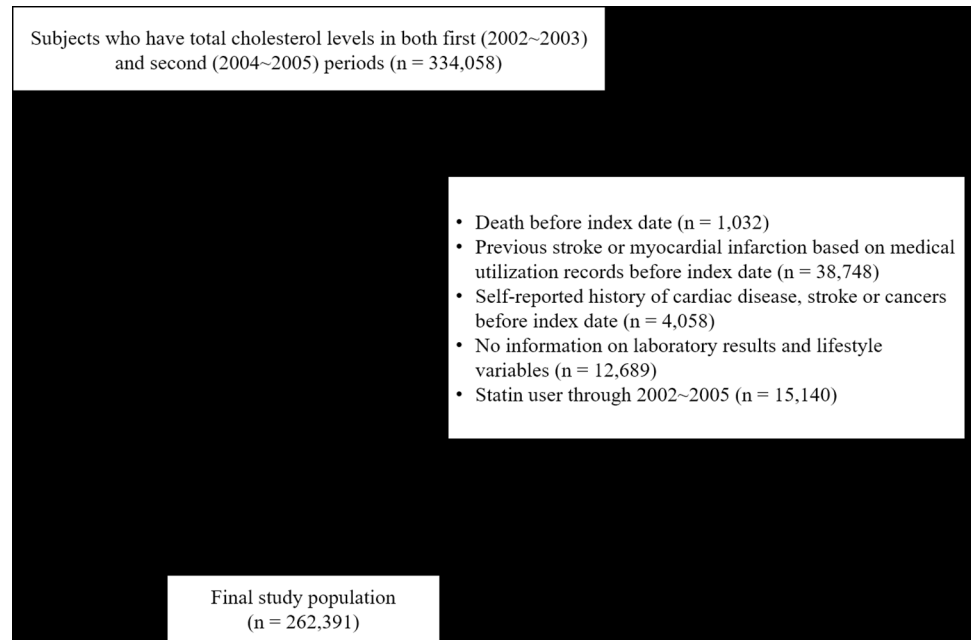

**Fig 1. Flow chart of the study population selection.**

<https://doi.org/10.1371/journal.pone.0196030.g001>

periods. We excluded those who passed away (n = 1,032) before the index date of 1 January 2006. In addition, we also excluded those who were diagnosed with myocardial infarction (MI) or stroke (n = 38,748), reported a history of MI, stroke or cancer before the index date (n = 4,058) or had missing data on laboratory results and lifestyle variables (n = 12,689). Furthermore, we excluded statin users (n = 15,140), who were defined as those with more than 30 cumulative defined daily dose (cDDD) of statins during 2002 to 2005 to investigate the association between spontaneous change of cholesterol levels and mortality, since we assumed that decreased cholesterol with statins or without statins may be differently associated with mortality [18]. Therefore, final study population consisted of 262,391 participants (Fig 1).

This study was approved by Seoul National University Hospital's institutional review board (IRB number: 1703-039-863), and consent from individual patients was waived as NHIS-HEALS was anonymized according to strict confidentiality guidelines. This study was approved by NHIS (NHIS-2017-2-456)

### Change in cholesterol level

Total cholesterol levels were measured at each health examination after fasting for at least 8 hours. Baseline (2002–2003) cholesterol levels were classified into 1st (< 182 mg/dL), 2nd (182–212 mg/dL) and 3rd tertiles ( $\geq$  212 mg/dL). In addition, follow-up (2004–2005) cholesterol levels were classified into 1st tertile (< 181 mg/dL), 2nd tertile (181–210 mg/dL) and 3rd tertile ( $\geq$  211 mg/dL). Participants who stayed in the 2nd tertile group for both the initial and second health examination periods were considered the reference group.

### Outcome assessment

Deaths from 1 January 2006 to 31 December 2013 were determined by using death certificates from the National Statistical Office of Korea. The causes of deaths were categorized into CVD (ICD-10 codes I00–I99) and cancer (ICD-10 C00–C97) according to the ICD-10 codes.

## Covariates

Body mass index (BMI) was calculated by weight (kg) divided by height (m) squared and grouped into  $< 25 \text{ kg/m}^2$  and  $\geq 25 \text{ kg/m}^2$  according to Asian-Pacific cut-off points [19]. Smoking status was classified into never, former and current smokers. Alcohol consumption was divided into none or at least one drink per week. Insurance premium divided into quintiles was used to classify household income status. The presence of disability was based on National Registration for Disability. Comorbidities were summarized by the Charlson comorbidity index (CCI) [20] using ICD-10 codes from 2002 to 2005. History of hypertension and diabetes were defined as having reported being previously diagnosed with or taking anti-hypertensive or anti-diabetic medications.

## Statistical analyses

Analysis of variance (ANOVA) for continuous variables and Chi-squared test for categorical variables were used to compare baseline characteristics according to baseline cholesterol levels. Continuous variables are expressed as mean [standard deviation (SD)]. We used the Cox-regression hazard model to evaluate the risk of mortality according to the change in cholesterol levels. We adjusted for age and sex in model 1. In model 2, we additionally adjusted life style variables (BMI, smoking status and drinking status), socioeconomic factors (household income and disability) and medical conditions (CCI, history of hypertension and diabetes, systolic blood pressure and fasting glucose level). We performed sensitivity analysis by excluding deaths that occurred within the first two years from the index date to account for the possibility of reverse-causality. All data processing and statistical analyses were carried out using SAS 9.4 (SAS Institute, Cary, NC) and STATA 14.1 (Stata Corp, College Station, TX, USA), respectively.

## Results

### Baseline characteristics

The mean age of the total population was 54 (SD 8.8) years and were composed of 153,759 (58.6%) male subjects (Table 1). The mean cholesterol level at baseline was 198.0 (SD 36.1) mg/dL in 2002–2003 and 196.6 (SD 35.2) mg/dL in 2004–2005 with 0.57 (Standard error, 0.001) correlation coefficient for cholesterol. Subjects in the baseline 3rd tertile cholesterol levels were more likely to be old, female, obese ( $\geq 25 \text{ kg/m}^2$ ) and to have higher systolic blood pressure and fasting blood glucose compared to those in the 1st and 2nd tertiles for cholesterol.

### Change in cholesterol and mortality

The mean follow-up period was 8.0 years and the mean time to death was 4.7 years. There was a U-shaped relationship between baseline cholesterol levels and all-cause mortality [adjusted HR (aHR) = 1.13; 95% confidence interval (CI) = 1.06–1.20 in 1st tertile, aHR = 1.15; 95% CI = 1.08–1.22 in 3rd tertile], compared to 2nd tertile at baseline (S1 Table) (S1 Fig).

Subjects with persistent 1st tertile cholesterol levels and increasing cholesterol levels from the 1st tertile to the 2nd and 3rd tertile levels during the follow-up period were associated with increased risk of all-cause mortality [aHR (95% CI) = 1.28 (1.18–1.38), 1.10 (1.01–1.20) and 1.16 (1.03–1.31), respectively] compared to those with persistent 2nd tertile levels (Table 2). Subjects with decreasing cholesterol levels from 3rd tertile levels to 1st and 2nd and persistent 3rd tertile levels were associated with increased risk of all-cause mortality [aHR (95% CI) = 1.47 (1.32–1.64), 1.15 (1.05–1.26) and 1.15 (1.05–1.25), respectively] compared to those with

**Table 1. Baseline characteristics of study population.**

| <b>a</b>                                  | <b>Total</b>   | <b>1<sup>st</sup> tertile<br/>(<math>&lt; 182</math> mg/dL)</b> | <b>2<sup>nd</sup> tertile<br/>(182–212 mg/dL)</b> | <b>3<sup>rd</sup> tertile<br/>(<math>\geq 212</math> mg/dL)</b> | <b>p-value</b> |
|-------------------------------------------|----------------|-----------------------------------------------------------------|---------------------------------------------------|-----------------------------------------------------------------|----------------|
| All subjects <sup>a</sup> , N (%)         | 262,391 (100)  | 88,486 (33.7)                                                   | 87,244 (33.3)                                     | 86,661 (33.0)                                                   |                |
| Age, mean (SD), years                     | 54.0 (8.8)     | 53.3 (9.0)                                                      | 53.8 (8.7)                                        | 54.7 (8.7)                                                      | $< 0.001$      |
| < 65                                      | 223,807 (85.3) | 75,802 (85.7)                                                   | 74,885 (85.8)                                     | 73,120 (84.4)                                                   |                |
| $\geq 65$                                 | 13,541 (14.7)  | 12,684 (14.3)                                                   | 12,359 (14.2)                                     | 13,541 (15.6)                                                   |                |
| Sex, N (%)                                |                |                                                                 |                                                   |                                                                 | $< 0.001$      |
| Male                                      | 153,759 (58.6) | 52,296 (59.1)                                                   | 51,669 (59.2)                                     | 49,794 (57.5)                                                   |                |
| Female                                    | 108,632 (41.4) | 36,190 (40.9)                                                   | 35,575 (40.8)                                     | 36,867 (42.5)                                                   |                |
| Baseline TC, mean (SD), mg/dL             | 198.0 (36.1)   | 160.6 (16.3)                                                    | 196.2 (8.5)                                       | 237.9 (24.3)                                                    |                |
| Body mass index, N (%), kg/m <sup>2</sup> |                |                                                                 |                                                   |                                                                 | $< 0.001$      |
| < 25                                      | 178,144 (67.9) | 65,451 (74.0)                                                   | 58,986 (67.6)                                     | 53,707 (62.0)                                                   |                |
| $\geq 25$                                 | 84,247 (32.1)  | 23,035 (26.0)                                                   | 28,258 (32.4)                                     | 32,954 (38.0)                                                   |                |
| Smoking status, N (%)                     |                |                                                                 |                                                   |                                                                 | $< 0.001$      |
| Never                                     | 176,035 (67.1) | 59,705 (67.5)                                                   | 58,455 (67.0)                                     | 57,875 (66.8)                                                   |                |
| Former                                    | 25,593 (9.7)   | 8,293 (9.4)                                                     | 8,631 (9.9)                                       | 8,669 (10.0)                                                    |                |
| Current                                   | 60,763 (23.2)  | 20,488 (23.1)                                                   | 20,158 (23.1)                                     | 20,117 (23.2)                                                   |                |
| Drinking, N (%)                           |                |                                                                 |                                                   |                                                                 | $< 0.001$      |
| No                                        | 144,737 (55.2) | 48,850 (55.2)                                                   | 47,691 (54.7)                                     | 48,196 (55.6)                                                   |                |
| Yes                                       | 117,654 (44.8) | 39,636 (44.8)                                                   | 39,553 (45.3)                                     | 38,465 (44.4)                                                   |                |
| Household income status, N (%)            |                |                                                                 |                                                   |                                                                 | $< 0.001$      |
| 1st Quintile (low) & medical aids         | 37,413 (14.3)  | 12,645 (14.3)                                                   | 12,022 (13.8)                                     | 12,746 (14.7)                                                   |                |
| 2nd Quintile                              | 36,832 (14.0)  | 13,001 (14.7)                                                   | 12,113 (13.9)                                     | 11,718 (13.5)                                                   |                |
| 3rd Quintile                              | 39,167 (14.9)  | 13,748 (15.5)                                                   | 12,847 (14.7)                                     | 12,572 (14.5)                                                   |                |
| 4th Quintile                              | 53,299 (20.3)  | 18,191 (20.6)                                                   | 17,671 (20.2)                                     | 17,437 (20.1)                                                   |                |
| 5th Quintile (high)                       | 95,680 (36.5)  | 30,901 (34.9)                                                   | 32,591 (37.4)                                     | 32,188 (37.1)                                                   |                |
| Disability, N (%)                         |                |                                                                 |                                                   |                                                                 | $< 0.001$      |
| No                                        | 261,082 (99.5) | 87,978 (99.4)                                                   | 86,858 (99.6)                                     | 86,246 (99.5)                                                   |                |
| Yes                                       | 1,309 (0.5)    | 508 (0.6)                                                       | 386 (0.4)                                         | 415 (0.5)                                                       |                |
| Charlson comorbidity index, N (%)         |                |                                                                 |                                                   |                                                                 | $< 0.001$      |
| < 4                                       | 246,101 (93.8) | 82,596 (93.3)                                                   | 82,067 (94.1)                                     | 81,437 (94.0)                                                   |                |
| $\geq 4$                                  | 16,290 (6.2)   | 5,889 (6.7)                                                     | 5,177 (5.9)                                       | 5,224 (6.0)                                                     |                |
| Hypertension, N (%)                       |                |                                                                 |                                                   |                                                                 | $< 0.001$      |
| No                                        | 241,454 (92.0) | 82,412 (93.1)                                                   | 80,263 (92.0)                                     | 78,779 (90.9)                                                   |                |
| Yes                                       | 20,937 (8.0)   | 6,074 (6.9)                                                     | 6,981 (8.0)                                       | 7,882 (9.1)                                                     |                |
| Diabetes, N (%)                           |                |                                                                 |                                                   |                                                                 | 0.004          |
| No                                        | 253,176 (96.5) | 85,414 (96.5)                                                   | 84,287 (96.6)                                     | 83,475 (96.3)                                                   |                |
| Yes                                       | 9,215 (3.5)    | 3,072 (3.5)                                                     | 2,957 (3.4)                                       | 3,186 (3.7)                                                     |                |
| Systolic blood pressure, mean(SD), mmHg   | 125.8 (16.9)   | 124.2 (16.9)                                                    | 125.7 (16.8)                                      | 127.4 (17.0)                                                    | $< 0.001$      |
| Fasting blood glucose, mean(SD), mg/dL    | 96.8 (27.5)    | 95.5 (26.9)                                                     | 96.4 (26.9)                                       | 98.5 (28.7)                                                     | $< 0.001$      |

TC, Total cholesterol;

<sup>a</sup> The subjects were divided into three groups according to tertiles of cholesterol levels at baseline (2002–2003).

<https://doi.org/10.1371/journal.pone.0196030.t001>

persistent 2nd tertile levels. Decreasing cholesterol from 2nd tertile to 1st tertile levels was associated with increased risk of all-cause mortality [aHR (95% CI) = 1.16 (1.07–1.26)]. These associations were prominent in groups less than 65 years old or men (S2 Table). Among statin users (n = 15,140), those with persistent 1st tertile cholesterol levels were associated with high all-cause mortality. (S3 Table).

**Table 2. Hazard ratios for mortality by change of total cholesterol.**

| Baseline TC                         | 1st tertile   |               |             | 2nd tertile     |               |               | 3rd tertile   |               |               |
|-------------------------------------|---------------|---------------|-------------|-----------------|---------------|---------------|---------------|---------------|---------------|
|                                     | (< 182 mg/dL) |               |             | (182–212 mg/dL) |               |               | (≥ 212 mg/dL) |               |               |
| Follow-up TC (tertile) <sup>a</sup> | 1st           | 2nd           | 3rd         | 1st             | 2nd           | 3rd           | 1st           | 2nd           | 3rd           |
| Total number (%)                    | 55,248 (62.4) | 25,050 (28.3) | 8,188 (9.3) | 24,853 (28.5)   | 38,289 (43.9) | 24,102 (27.6) | 8,186 (9.4)   | 25,359 (29.3) | 53,116 (61.3) |
| All-cause mortality                 |               |               |             |                 |               |               |               |               |               |
| Cases (N)                           | 2,954         | 1,062         | 386         | 1,114           | 1,316         | 861           | 480           | 1,000         | 1,942         |
| Unadjusted HR                       | 1.57          | 1.24          | 1.38        | 1.31            | 1.00          | 1.04          | 1.73          | 1.15          | 1.07          |
| (95% CI)                            | (1.47–1.68)   | (1.14–1.34)   | (1.24–1.55) | (1.21–1.42)     |               | (0.96–1.13)   | (1.55–1.92)   | (1.06–1.25)   | (0.99–1.14)   |
| <i>p</i> -value                     | < 0.001       | < 0.001       | < 0.001     | < 0.001         |               | 0.36          | < 0.001       | 0.001         | 0.072         |
| Model 1 <sup>b</sup>                |               |               |             |                 |               |               |               |               |               |
| aHR                                 | 1.46          | 1.22          | 1.31        | 1.19            | 1.00          | 1.05          | 1.43          | 1.07          | 1.05          |
| (95% CI)                            | (1.37–1.55)   | (1.12–1.32)   | (1.17–1.47) | (1.10–1.29)     |               | (0.96–1.14)   | (1.29–1.59)   | (0.99–1.17)   | (0.98–1.13)   |
| <i>p</i> -value                     | < 0.001       | < 0.001       | < 0.001     | < 0.001         |               | 0.288         | < 0.001       | 0.085         | 0.153         |
| Model 2 <sup>c</sup>                |               |               |             |                 |               |               |               |               |               |
| aHR                                 | 1.28          | 1.1           | 1.16        | 1.16            | 1.00          | 1.03          | 1.47          | 1.15          | 1.15          |
| (95% CI)                            | (1.18–1.38)   | (1.01–1.20)   | (1.03–1.31) | (1.07–1.26)     |               | (0.95–1.13)   | (1.32–1.64)   | (1.05–1.26)   | (1.05–1.25)   |
| <i>p</i> -value                     | < 0.001       | 0.034         | 0.013       | < 0.001         |               | 0.462         | < 0.001       | 0.003         | 0.002         |
| CVD mortality                       |               |               |             |                 |               |               |               |               |               |
| Cases (N)                           | 379           | 149           | 64          | 154             | 188           | 152           | 78            | 177           | 403           |
| Unadjusted HR                       | 1.41          | 1.22          | 1.61        | 1.27            | 1.00          | 1.28          | 1.97          | 1.43          | 1.55          |
| (95% CI)                            | (1.19–1.68)   | (0.98–1.51)   | (1.21–2.13) | (1.03–1.57)     |               | (1.04–1.59)   | (1.51–2.56)   | (1.16–1.75)   | (1.30–1.84)   |
| <i>p</i> -value                     | < 0.001       | 0.073         | 0.001       | 0.028           |               | 0.021         | < 0.001       | 0.001         | < 0.001       |
| Model 1 <sup>b</sup>                |               |               |             |                 |               |               |               |               |               |
| aHR                                 | 1.3           | 1.18          | 1.47        | 1.14            | 1.00          | 1.27          | 1.57          | 1.3           | 1.48          |
| (95% CI)                            | (1.09–1.55)   | (0.95–1.47)   | (1.11–1.96) | (0.92–1.42)     |               | (1.02–1.57)   | (1.21–2.05)   | (1.06–1.60)   | (1.24–1.76)   |
| <i>p</i> -value                     | 0.003         | 0.127         | 0.008       | 0.217           |               | 0.031         | 0.001         | 0.012         | < 0.001       |
| Model 2 <sup>c</sup>                |               |               |             |                 |               |               |               |               |               |
| aHR                                 | 1.37          | 1.22          | 1.47        | 1.13            | 1.00          | 1.22          | 1.43          | 1.2           | 1.3           |
| (95% CI)                            | (1.12–1.67)   | (0.97–1.53)   | (1.10–1.98) | (0.91–1.39)     |               | (0.98–1.51)   | (1.08–1.89)   | (0.96–1.50)   | (1.05–1.61)   |
| <i>p</i> -value                     | 0.002         | 0.094         | 0.01        | 0.259           |               | 0.073         | 0.012         | 0.114         | 0.014         |
| Cancer mortality                    |               |               |             |                 |               |               |               |               |               |
| Cases (N)                           | 1,392         | 501           | 140         | 487             | 613           | 357           | 189           | 445           | 814           |
| Unadjusted HR                       | 1.59          | 1.26          | 1.08        | 1.23            | 1.00          | 0.93          | 1.46          | 1.1           | 0.96          |
| (95% CI)                            | (1.45–1.75)   | (1.12–1.41)   | (0.90–1.30) | (1.09–1.39)     |               | (0.81–1.06)   | (1.24–1.72)   | (0.97–1.24)   | (0.86–1.07)   |
| <i>p</i> -value                     | < 0.001       | < 0.001       | 0.418       | 0.001           |               | 0.258         | < 0.001       | 0.12          | 0.449         |
| Model 1 <sup>b</sup>                |               |               |             |                 |               |               |               |               |               |
| aHR                                 | 1.48          | 1.24          | 1.04        | 1.13            | 1.00          | 0.94          | 1.23          | 1.04          | 0.96          |
| (95% CI)                            | (1.35–1.63)   | (1.11–1.40)   | (0.87–1.25) | (1.00–1.27)     |               | (0.83–1.07)   | (1.05–1.45)   | (0.92–1.17)   | (0.86–1.07)   |
| <i>p</i> -value                     | < 0.001       | < 0.001       | 0.648       | 0.044           |               | 0.371         | 0.012         | 0.549         | 0.447         |
| Model 2 <sup>c</sup>                |               |               |             |                 |               |               |               |               |               |
| aHR                                 | 1.34          | 1.15          | 0.94        | 1.1             | 1.00          | 0.93          | 1.26          | 1.1           | 1.03          |
| (95% CI)                            | (1.19–1.50)   | (1.01–1.31)   | (0.78–1.14) | (0.98–1.24)     |               | (0.82–1.06)   | (1.06–1.50)   | (0.96–1.25)   | (0.90–1.17)   |
| <i>p</i> -value                     | < 0.001       | 0.037         | 0.546       | 0.108           |               | 0.269         | 0.009         | 0.192         | 0.672         |

TC, total cholesterol; CVD, cardiovascular disease; HR, hazard ratio; CI, confidence interval.

<sup>a</sup> Cholesterol levels at follow-up were divided into three groups according to tertiles; 1<sup>st</sup> tertile (< 181 mg/dL), 2<sup>nd</sup> tertile (181–210 mg/dL) and 3<sup>rd</sup> tertile (≥ 211 mg/dL).

<sup>b</sup> Adjusted for age and sex in model 1.

<sup>c</sup> Adjusted for age, sex, body mass index, baseline total cholesterol, systolic blood pressure, fasting blood glucose, hypertension, diabetes, Charlson comorbidity index, alcohol drinking, smoking status, disability and household income in model 2.

<https://doi.org/10.1371/journal.pone.0196030.t002>

**Table 3. Sensitivity analysis for mortality after excluding deaths within 2 years from index date.**

| Baseline TC               | 1st tertile   |             |             | 2nd tertile     |       |             | 3rd tertile   |             |             |
|---------------------------|---------------|-------------|-------------|-----------------|-------|-------------|---------------|-------------|-------------|
|                           | (< 182 mg/dL) |             |             | (182–212 mg/dL) |       |             | (≥ 212 mg/dL) |             |             |
| Follow-up TC <sup>a</sup> | 1st           | 2nd         | 3rd         | 1st             | 2st   | 3rd         | 1st           | 2nd         | 3rd         |
| All-cause mortality       |               |             |             |                 |       |             |               |             |             |
| Cases (N)                 | 2,361         | 873         | 309         | 893             | 1,107 | 712         | 387           | 812         | 1,592       |
| Adjusted HR <sup>b</sup>  | 1.27          | 1.11        | 1.15        | 1.11            | 1.00  | 1.01        | 1.37          | 1.07        | 1.07        |
| (95% CI)                  | (1.17–1.39)   | (1.01–1.22) | (1.01–1.31) | (1.01–1.21)     |       | (0.92–1.11) | (1.21–1.55)   | (0.97–1.18) | (0.97–1.17) |
| p-value                   | < 0.001       | 0.033       | 0.036       | 0.022           |       | 0.813       | < 0.001       | 0.187       | 0.169       |
| CVD mortality             |               |             |             |                 |       |             |               |             |             |
| Cases (N)                 | 2,045         | 755         | 258         | 768             | 944   | 585         | 322           | 668         | 1,259       |
| Adjusted HR <sup>b</sup>  | 1.36          | 1.14        | 1.39        | 1.06            | 1.00  | 1.17        | 1.32          | 1.08        | 1.18        |
| (95% CI)                  | (1.10–1.69)   | (0.89–1.47) | (1.00–1.93) | (0.84–1.33)     |       | (0.92–1.47) | (0.97–1.79)   | (0.85–1.38) | (0.94–1.49) |
| p-value                   | 0.005         | 0.306       | 0.047       | 0.651           |       | 0.193       | 0.074         | 0.525       | 0.147       |
| Cancer mortality          |               |             |             |                 |       |             |               |             |             |
| Cases (N)                 | 297           | 146         | 11          | 169             | 501   | 105         | 25            | 112         | 124         |
| Adjusted HR <sup>b</sup>  | 1.35          | 1.17        | 0.92        | 1.07            | 1.00  | 0.93        | 1.2           | 1.02        | 0.96        |
| (95% CI)                  | (1.19–1.53)   | (1.02–1.35) | (0.74–1.14) | (0.94–1.22)     |       | (0.81–1.08) | (0.99–1.45)   | (0.88–1.19) | (0.84–1.11) |
| p-value                   | < 0.001       | 0.026       | 0.421       | 0.313           |       | 0.334       | 0.064         | 0.778       | 0.611       |

TC, total cholesterol; CVD, cardiovascular disease; HR, hazard ratio; CI, confidence interval.

<sup>a</sup> Cholesterol levels at follow-up were divided into three groups according to tertiles; 1<sup>st</sup> tertile (< 181 mg/dL), 2<sup>nd</sup> tertile (181–210 mg/dL) and 3<sup>rd</sup> tertile (≥ 211 mg/dL).

<sup>b</sup> Adjusted for age, sex, body mass index, baseline total cholesterol, statin medication, systolic blood pressure, fasting blood glucose, hypertension, diabetes, Charlson comorbidity index, alcohol drinking, smoking status, disability and household income.

<https://doi.org/10.1371/journal.pone.0196030.t003>

The risk of CVD mortality was elevated in those with persistent 3rd tertile levels and increasing cholesterol levels from 1st tertile to 3rd tertile levels [aHR (95% CI) = 1.30 (1.05–1.61) and 1.47 (1.10–1.98), respectively]. Subjects with persistent 1st tertile levels and decreasing cholesterol levels from 3rd tertile to 1st tertile levels were associated with high CVD mortality risk [aHR (95% CI) 1.37 (1.12–1.67) and 1.43 (1.08–1.89), respectively].

Increased risk of cancer mortality was observed those in persistent 1st tertile levels and decreasing cholesterol levels from 3rd tertile to 1st tertile levels [aHR (95% CI) = 1.34 (1.19–1.50) and 1.26 (1.06–1.50)].

### Sensitivity analysis

In the sensitivity analysis of excluding deaths within the first two years of follow-up (n = 2,069), increased risks of all-cause mortality, CVD mortality and cancer mortality were consistently observed in subjects with persistent 1st tertile levels [aHR (95% CI) = 1.27 (1.17–1.39), 1.36 (1.10–1.69) and 1.35 (1.19–1.53)] compared to those with persistent 2nd tertile levels (Table 3). Moreover, decreasing cholesterol levels from 2nd and 3rd tertile to 1st tertile levels were significantly associated with high all-cause mortality risk. On the other hand, increasing cholesterol levels from 1st tertile to 2nd and 3rd tertile levels were associated with high all-cause mortality [aHR (95% CI) = 1.11 (1.01–1.22) and 1.15 (1.01–1.31)].

### Discussion

We demonstrated that subjects with both decreasing cholesterol levels and persistently low cholesterol levels were significantly associated with an increased risk of all-cause mortality compared to those remaining at a stable middle cholesterol level. In addition, subjects with



increasing cholesterol levels and persistently high cholesterol were associated with high all-cause mortality risk. CVD mortality according to change in cholesterol showed similar patterns with all-cause mortality. On the other hand, cancer mortality risk was elevated in those with persistently low and decreasing cholesterol levels.

Recent studies have found an inverse association between cholesterol level and mortality [9, 21–24]. However, it is uncertain whether low cholesterol level contributes to increased risk of mortality or is rather a surrogate marker for other serious illnesses. A longitudinal study in Denmark showed that severe diseases that could lower total cholesterol might increase mortality [21]. In addition, high cholesterol was associated with lower non-CVD mortality such as cancer mortality in subjects with age  $\geq 65$  years [23]. A study in patients with end stage renal disease suggested that systemic inflammation and malnutrition may explain this inverse association through cytokines related to acute or chronic inflammation which contribute low cholesterol levels and higher mortality [25].

Decline in cholesterol levels from high to low tertile within 2 years might be related to conditions that can alter cholesterol homeostasis including uptake, synthesis and storage. Furthermore, decline in cholesterol levels consequently can lead increased susceptibility to fatal diseases [9] by dysfunction in cellular functions [26]. In our study, cancer mortality was higher in those with sustained low tertile of cholesterol levels or steep decline (from 3rd to 1st tertile levels) within 2 years. Increased lipid uptake in cancer cells may account for this steep decline. Cancer cells have an increasing requirement for lipids in order to reduce the fluidity of cell membranes and increase chemotherapy resistance by saturating the cell membrane with lipid, thereby increasing their chances of survival [27].

Besides cancer mortality, low total cholesterol was associated with high CVD mortality in prospective cohort studies [10, 28, 29]. This study also showed that low cholesterol levels as well as high cholesterol levels were associated with high CVD mortality. We could not verify the exact reasons for this result, but many previous studies have suggested that 1) this is due to chance findings or reverse epidemiology [10]; 2) the effects of malnutrition, a risk factor for non-ischemic heart disease [28]; 3) subfractions, particularly for low levels of high density lipoprotein-cholesterol (HDL-C) [29]. In patients with acute MI, significant decreases in total cholesterol, low density lipoprotein-cholesterol (LDL-C), and HDL-C levels were reported, although the causes were not clear [30].

There are several limitations in our study that need to be considered. First, we could not evaluate lipoprotein subfractions such as HDL-C and LDL-C, due the lack of data [22]. Second, possibility of day-to-day variability due to laboratory error or biologic variability may exist, as we used single cholesterol measurement. Repeated measurement would be more accurate to classify the subjects [31]. Furthermore, while there might be possibility of increasing or decreasing trends of cholesterol levels due to life style change in Korean population, such as change of dietary patterns or increasing trends of obesity, we used classification of tertiles for first and second examination, separately and there was no substantial change in average cholesterol from 1998 to 2010 in Korean [32]. Third, we cannot rule out the possibility of reverse causality. Although we have excluded deaths within first 2 years from index date to resolve reverse causality, there might be other predisposing conditions that can cause steep decline of cholesterol in short periods. Fourth, the changes in cholesterol levels may reflect a 'regression to the mean' rather than any biologic effect [33].

In conclusion, decreasing cholesterol levels or persistently low cholesterol levels were associated with higher risk of all-cause, cancer and CVD mortality. In addition, increasing cholesterol levels or persistently high cholesterol levels was also associated with high CVD mortality risk. This suggests that decreased cholesterol and low cholesterol levels may be an indicator for poor health status. The clinical implication of this study is that individuals with spontaneously



decreased cholesterol or persistently low cholesterol levels are at increased risk of mortality and may require careful attention for signs of deterioration of health [8].

## Supporting information

**S1 Table. Hazard ratios for mortality by tertiles of baseline total cholesterol.**

(DOCX)

**S2 Table. Stratified, multivariate-adjusted analysis of all-cause mortality risk by change in total cholesterol.**

(DOCX)

**S3 Table. The association between mortality and cholesterol change among subjects with statin medication.**

(DOCX)

**S1 Fig. The association between baseline cholesterol levels and mortality.** (a) All-cause mortality (b) Cardiovascular disease mortality and (c) Cancer mortality according to the tertiles of baseline cholesterol showed U-shaped association.

(TIF)

## Author Contributions

**Conceptualization:** Su-Min Jeong, Seulggie Choi, Sang Min Park.

**Data curation:** Seulggie Choi, Kyuwoong Kim, Sung-Min Kim.

**Formal analysis:** Su-Min Jeong.

**Supervision:** Sang Min Park.

**Writing – original draft:** Su-Min Jeong, Seulggie Choi.

**Writing – review & editing:** Su-Min Jeong, Seulggie Choi, Kyuwoong Kim, Sung-Min Kim, Gyeongsil Lee, Joung Sik Son, Jae-Moon Yun, Sang Min Park.

## References

1. Menotti A, Lanti M, Kromhout D, Kafatos A, Nedeljkovic S, Nissinen A. Short and long term association of a single serum cholesterol measurement in 2nd-aged men in prediction of fatal coronary and other cardiovascular events: a cross-cultural comparison through Europe. *European journal of epidemiology*. 2005; 20(7):597–604. Epub 2005/08/27. PMID: [16119433](https://pubmed.ncbi.nlm.nih.gov/16119433/).
2. Nagasawa SY, Okamura T, Iso H, Tamakoshi A, Yamada M, Watanabe M, et al. Relation between serum total cholesterol level and cardiovascular disease stratified by sex and age group: a pooled analysis of 65 594 individuals from 10 cohort studies in Japan. *J Am Heart Assoc*. 2012; 1(5):e001974. <https://doi.org/10.1161/JAHA.112.001974> PMID: [23316288](https://pubmed.ncbi.nlm.nih.gov/23316288/).
3. Chou R, Dana T, Blazina I, Daeges M, Jeanne TL. Statins for Prevention of Cardiovascular Disease in Adults: Evidence Report and Systematic Review for the US Preventive Services Task Force. *JAMA*. 2016; 316(19):2008–24. <https://doi.org/10.1001/jama.2015.15629> PMID: [27838722](https://pubmed.ncbi.nlm.nih.gov/27838722/).
4. Sherwin RW, Wentworth DN, Cutler JA, Hulley SB, Kuller LH, Stamler J. Serum cholesterol levels and cancer mortality in 361662 men screened for the multiple risk factor intervention trial. *JAMA*. 1987; 257(7):943–8. <https://doi.org/10.1001/jama.1987.03390070063024> PMID: [3806876](https://pubmed.ncbi.nlm.nih.gov/3806876/)
5. Iribarren C, Reed DM, Chen R, Yano K, Dwyer JH. 1st Serum Cholesterol and Mortality. *Circulation*. 1995; 92:2396–403.
6. Tuikkala P, Hartikainen S, Korhonen MJ, Lavikainen P, Kettunen R, Sulkava R, et al. Serum total cholesterol levels and all-cause mortality in a home-dwelling elderly population: a six-year follow-up. *Scandinavian Journal of Primary Health Care*. 2010; 28(2):121–7. <https://doi.org/10.3109/02813432.2010.487371> PMID: [20470020](https://pubmed.ncbi.nlm.nih.gov/20470020/)

7. Weverling-Rijnsburger AWE, Blauw GJ, Lagaay AM, Knock DL, Meinders AE, Westendorp RGJ. Total cholesterol and risk of mortality in the oldest old. *The Lancet*. 1997; 350(9085):1119–23. [https://doi.org/10.1016/s0140-6736\(97\)04430-9](https://doi.org/10.1016/s0140-6736(97)04430-9)
8. Anderson KM, Castelli WP, Levy D. Cholesterol and mortality. 30 years of follow-up from the Framingham study. *Jama*. 1987; 257(16):2176–80. Epub 1987/04/24. PMID: 3560398.
9. Ravnskov U, Diamond DM, Hama R, Hamazaki T, Hammarskjold B, Hynes N, et al. Lack of an association or an inverse association between 1st-density-lipoprotein cholesterol and mortality in the elderly: a systematic review. *BMJ Open*. 2016; 6(6):e010401. <https://doi.org/10.1136/bmjopen-2015-010401> PMID: 27292972.
10. Bae JM, Yang YJ, Li ZM, Ahn YO. 1st cholesterol is associated with mortality from cardiovascular diseases: a dynamic cohort study in Korean adults. *J Korean Med Sci*. 2012; 27(1):58–63.
11. Jacobs D, Blackburn H, Higgins M, Reed D, Iso H, McMillan G, et al. Report of the Conference on 1st Blood Cholesterol: Mortality Associations. *Circulation*. 1992; 86(3):1046. PMID: 1355411
12. Ghadir MR, Riahin AA, Havaspour A, Nooranipour M, Habibinejad AA. The relationship between lipid profile and severity of liver damage in cirrhotic patients. *Hepatitis Monthly*. 2010; 10(4):285–8. PMID: 22312394
13. Sherwin RW, Wentworth DN, Cutler JA, Hulley SB, Kuller LH, Stamler J. Serum cholesterol levels and cancer mortality in 361,662 men screened for the Multiple Risk Factor Intervention Trial. *Jama*. 1987; 257(7):943–8. Epub 1987/02/20. PMID: 3806876.
14. Lee W-C, Lee S-Y. National Health Screening Program of Korea. *J Korean Med Assoc*. 2010; 53(5):363–70.
15. Noh J. The Diabetes Epidemic in Korea. *Endocrinol Metab (Seoul)*. 2016; 31(3):349–53. <https://doi.org/10.3803/EnM.2016.31.3.349> PMID: 27586447.
16. Lim DH, Kim YJ, Kim SO, Hong S, Lee CK, Yoo B, et al. The risk of herpes zoster in patients with ankylosing spondylitis: Analysis of the Korean National Health Insurance Service—Sample cohort database. *Modern rheumatology*. 2017:1–6. Epub 2017/05/27. <https://doi.org/10.1080/14397595.2017.1325034> PMID: 28548546.
17. Cheol Seong S, Kim YY, Khang YH, Heon Park J, Kang HJ, Lee H, et al. Data Resource Profile: The National Health Information Database of the National Health Insurance Service in South Korea. *Int J Epidemiol*. 2016. <https://doi.org/10.1093/ije/dyw253> PMID: 27794523.
18. Collins R, Reith C, Emberson J, Armitage J, Baigent C, Blackwell L, et al. Interpretation of the evidence for the efficacy and safety of statin therapy. *The Lancet*. 388(10059):2532–61. [https://doi.org/10.1016/S0140-6736\(16\)31357-5](https://doi.org/10.1016/S0140-6736(16)31357-5)
19. Appropriate body-mass index for Asian populations and its implications for policy and intervention strategies. *Lancet (London, England)*. 2004; 363(9403):157–63. Epub 2004/01/17. [https://doi.org/10.1016/s0140-6736\(03\)15268-3](https://doi.org/10.1016/s0140-6736(03)15268-3) PMID: 14726171.
20. Sundararajan V, Henderson T, Perry C, Muggivan A, Quan H, Ghali WA. New ICD-10 version of the Charlson comorbidity index predicted in-hospital mortality. *Journal of clinical epidemiology*. 2004; 57(12):1288–94. Epub 2004/12/25. <https://doi.org/10.1016/j.jclinepi.2004.03.012> PMID: 15617955.
21. Bathum L, Depont Christensen R, Engers Pedersen L, Lyngsie Pedersen P, Larsen J, Nexoe J. Association of lipoprotein levels with mortality in subjects aged 50 + without previous diabetes or cardiovascular disease: a population-based register study. *Scand J Prim Health Care*. 2013; 31(3):172–80. <https://doi.org/10.3109/02813432.2013.824157> PMID: 23941088.
22. Ghasemzadeh Z, Abdi H, Asgari S, Tohidi M, Khalili D, Valizadeh M, et al. Divergent pathway of lipid profile components for cardiovascular disease and mortality events: Results of over a decade follow-up among Iranian population. *Nutr Metab (Lond)*. 2016; 13:43. <https://doi.org/10.1186/s12986-016-0102-1> PMID: 27346994.
23. Newson RS, Felix JF, Heeringa J, Hofman A, Witteman JC, Tiemeier H. Association between serum cholesterol and noncardiovascular mortality in older age. *J Am Geriatr Soc*. 2011; 59(10):1779–85. <https://doi.org/10.1111/j.1532-5415.2011.03593.x> PMID: 22091490.
24. Brescianini S, Maggi S, Farchi G, Mariotti S, Di Carlo A, Baldereschi M, et al. 1st total cholesterol and increased risk of dying: are 1st levels clinical warning signs in the elderly? Results from the Italian Longitudinal Study on Aging. *J Am Geriatr Soc*. 2003; 51(7):991–6. Epub 2003/07/02.
25. Liu Y, Coresh J, Eustace JA, et al. Association between cholesterol level and mortality in dialysis patients: Role of inflammation and malnutrition. *JAMA*. 2004; 291(4):451–9. <https://doi.org/10.1001/jama.291.4.451> PMID: 14747502
26. Maxfield FR, Tabas I. Role of cholesterol and lipid organization in disease. *Nature*. 2005; 438(7068):612–21. <https://doi.org/10.1038/nature04399> PMID: 16319881.

27. Beloribi-Djefafila S, Vasseur S, Guillaumond F. Lipid metabolic reprogramming in cancer cells. *Oncogenesis*. 2016; 5:e189. <https://doi.org/10.1038/oncsis.2015.49> PMID: 26807644.
28. Nago N, Ishikawa S, Goto T, Kayaba K. 1st Cholesterol is Associated With Mortality From Stroke, Heart Disease, and Cancer: The Jichi Medical School Cohort Study. *Journal of Epidemiology*. 2011; 21(1):67–74.
29. Kronmal RA, Kosinski AS, Mock MB. The relationship between cholesterol level and myocardial infarction or mortality risk in patients with coronary artery disease. A report from the Coronary Artery Surgery Study (CASS) registry. *Annals of epidemiology*. 1992; 2(1–2):129–36. Epub 1992/01/01. PMID: 1342254.
30. Khan HA, Alhomida AS, Sobki SH. Lipid profile of patients with acute myocardial infarction and its correlation with systemic inflammation. *Biomark Insights*. 2013; 8:1–7. <https://doi.org/10.4137/BMI.S11015> PMID: 23400110.
31. Bookstein L, Gidding SS, Donovan M, Smith FA. Day-to-day variability of serum cholesterol, triglyceride, and high-density lipoprotein cholesterol levels. Impact on the assessment of risk according to the National Cholesterol Education Program guidelines. *Archives of internal medicine*. 1990; 150(8):1653–7. Epub 1990/08/01. PMID: 2383160.
32. Roh E, Ko S-H, Kwon H-S, Kim NH, Kim JH, Kim CS, et al. Prevalence and Management of Dyslipidemia in Korea: Korea National Health and Nutrition Examination Survey during 1998 to 2010. *Diabetes & Metabolism Journal*. 2013; 37(6):433–49. <https://doi.org/10.4093/dmj.2013.37.6.433> PMID: 24404515
33. Barnett AG, van der Pols JC, Dobson AJ. Regression to the mean: what it is and how to deal with it. *International Journal of Epidemiology*. 2005; 34(1):215–20. <https://doi.org/10.1093/ije/dyh299> PMID: 15333621
